# Supplementary material
Source: Research Square preprint supplement (doi:10.21203/rs.3.rs-9001528/v1)
Supplement: Supplementary file 1 [file 6e9896da9ea6d92fef48bb2f.docx]

**Laboratory and Field Performance Assessment of LPWA Tilt Sensors for Slope Monitoring and Disaster Early Warning**

Ryosuke Miyake1, Tomoki Nakazora2, Naoki Kinoshita1, Hideaki Yasuhara2*

1 Department of Civil and Environmental Engineering, Ehime University, Matsuyama, 790-8577, JAPAN.

2 Department of Urban Management, Kyoto University, Kyoto, 615-8540, JAPAN.

*Corresponding Author: yasuhara.hideaki.7p@kyoto-u.ac.jp

**Appendix　A**

The results of the laboratory evaluation using Tilt Sensors A to G are presented below. In the Type A results, the inclination angles set by the laboratory test apparatus (Inclination) were plotted as square markers, while the inclination angles measured by the tilt sensors (X-axis) were plotted as red circles. When the tilt sensor accurately measured the applied inclination, the red circles overlapped with the square markers, indicating high accuracy. In the Type B results, the variation between the tilt sensor measurements and the applied inclination angles was analyzed. The horizontal axis represented the applied inclination angles, while the vertical axis represented the inclination angles measured by the tilt sensor. Ideally, the data points aligned along the 45° reference line, indicating a perfect agreement.

|  | |  |
| --- | --- | --- |
| Figure A1a. Result Type A (Y-axis from Tilt sensor A) | | Figure A1b. Result Type B (Y-axis from Tilt sensor A) |
|  | |  |
|  |  |
| Figure A2a. Result Type A (X-axis from Tilt sensor B) | Figure A2b. Result Type B (X-axis from Tilt sensor B) |
|  |  |
|  |  |
| Figure A3a. Result Type A (Y-axis from Tilt sensor B) | Figure A3b. Result Type B (Y-axis from Tilt sensor B) |
|  |  |
|  |  |
| Figure A4a. Result Type A (X-axis from Tilt sensor C) | Figure A4b. Result Type B (X-axis from Tilt sensor C) |
|  |  |
|  |  |
| Figure A5a. Result Type A (Y-axis from Tilt sensor C) | Figure A5b. Result Type B (Y-axis from Tilt sensor C) |
|  |  |
|  |  |
| Figure A6a. Result Type A (Z-axis from Tilt sensor C) | Figure A6b. Result Type B (Z-axis from Tilt sensor C) |
|  |  |
|  |  |
| Figure A7a. Result Type A (X-axis from Tilt sensor D) | Figure A7b. Result Type B (X-axis from Tilt sensor D) |
|  |  |
|  |  |
| Figure A8a. Result Type A (Y-axis from Tilt sensor D) | Figure A8b. Result Type B (Y-axis from Tilt sensor D) |
|  |  |
|  |  |
| Figure A9a. Result Type A (X-axis from Tilt sensor E) | Figure A9b. Result Type B (X-axis from Tilt sensor E) |
|  |  |
|  |  |
| Figure A10a. Result Type A (Y-axis from Tilt sensor E) | Figure A10b. Result Type B (Y-axis from Tilt sensor E) |
|  |  |
|  |  |
| Figure A11a. Result Type A (X-axis from Tilt sensor F) | Figure A11b. Result Type B (X-axis from Tilt sensor F) |
|  |  |
|  |  |
| Figure A12a. Result Type A (Y-axis from Tilt sensor F) | Figure A12b. Result Type B (Y-axis from Tilt sensor F) |
|  |  |
|  |  |
| Figure A13a. Result Type A (Z-axis from Tilt sensor F) | Figure A13b. Result Type B (Z-axis from Tilt sensor F) |
|  |  |
|  |  |
| Figure A14a. Result Type A (Tilt sensor G) | Figure A14b. Result Type B (Tilt sensor G) |
|  |  |
|  |  |
| Figure A15a. Result Type A (X-axis from Tilt sensor H) | Figure A15b. Result Type B (X-axis from Tilt sensor H) |
|  |  |
|  |  |
| Figure A17a. Result Type A (Y-axis from Tilt sensor H) | Figure A17b. Result Type B (Y-axis from Tilt sensor H) |
|  |  |

Appendix　B

Sensor C at site W (Figures B1 to B3):

Figure B1 presents one year of observation records from Tilt Sensor C in terms of tilt angles and rainfall. Similarly, in Figure B1, tilt angles appear stable around day 210 when no rainfall occurred. However, it is visually evident that Tilt Sensor C exhibits greater observational fluctuations compared to Tilt Sensor A.

Figure B2 illustrates the relationship between inclination rate and rainfall. It shows that the values consistently exceeded 0.02°/h throughout the observation period and occasionally surpassed 0.04°/h. Consequently, if the current proposed management threshold were applied, a Level 3 alert would be continuously issued. This suggests that detecting at the 0.02°/h threshold is difficult when using Tilt Sensor C.

Figure B3 shows the change in inclination over a three-day period without rainfall. The plots show convex upward patterns during the daytime when air temperature rises, and decreases in tilt angle during the nighttime when temperature drops. This behavior is likely attributable to the fact that Tilt Sensor C is an above-ground type tilt sensor, making it more susceptible to external temperature influences.

|  |
| --- |
| Figure B1. Composite Angle vs. Rainfall (Tilt sensor C) |
|  |
|  |
| Figure B2. Inclination rate vs. Rainfall (Tilt sensor C) |
|  |
|  |
|  |
| Figure B3. Effect of Temperature (Tilt Sensor C) |

Sensor D at site M (Figures B4 to B6):

Figure B4 presents one year of observation records from Tilt Sensor D in terms of tilt angles and rainfall. In Figure B4, tilt sensor D recorded a sudden increase in inclination on day 84. Since the rainfall on that day was only 3.5 mm, it is unlikely to be the sole cause. A preceding rainfall event, with 45.5 mm accumulated over six days from day 77, may have acted as the trigger. However, the abrupt increase of 0.22° is difficult to attribute to natural processes except during slope failure. Considering that such an increase was not observed in Figure 25, external disturbances, such as animal contact with aboveground components of the sensor system, may also be responsible.

Figure B5 illustrates the relationship between inclination rate and rainfall. Figure B5 indicates that tilt sensor D frequently recorded inclination rates exceeding 0.02°/h, with four exceedances of 0.1°/h within one year. Therefore, applying a 0.1°/h threshold for alarm purposes using this sensor requires careful evaluation.

Figure B6 shows the change in inclination over a three-day period without rainfall. As shown in Figure B6, tilt sensor D, being underground, was less affected by temperature fluctuations and provided stable records.

|  |
| --- |
|  |
| Figure B4. Composite Angle vs. Rainfall (Tilt sensor D) |
|  |
| Figure B5. Inclination rate vs. Rainfall (Tilt sensor D) |
|  |
| Figure B6. Effect of Temperature (Tilt Sensor D) |

Sensor G at site M (Figures B7 to B9):

Figure B7 presents one year of observation records from Tilt Sensor G in terms of tilt angles and rainfall. In Figure B7, tilt sensor G, which has the coarsest resolution among the eight sensors (0.1°), exhibited wider variability in inclination trends. On a long-term basis, increases were more pronounced after August, when rainfall was limited, than during the concentrated rainfall period from April to June.

Figure B8 illustrates the relationship between inclination rate and rainfall. Figure B8 further demonstrates that, due to its coarse resolution, tilt sensor G consistently recorded inclination rates above 0.1°/h.

Figure B9 shows the change in inclination over a three-day period without rainfall. Figure B9 shows that tilt sensor G, despite its coarse resolution, was able to capture diurnal variations. Inclination decreased from noon to afternoon when temperatures were higher, and increased again during nighttime as temperatures declined, producing a clear diurnal cycle.

|  |
| --- |
|  |
| Figure B7. Composite Angle vs. Rainfall (Tilt sensor G) |
|  |
|  |
| Figure B8. Inclination rate vs. Rainfall (Tilt sensor G) |
|  |
| Figure B9. Effect of Temperature (Tilt Sensor G) |

Sensor E at site A (Figures B10 to B12):

Figure B10 presents one year of observation records from Tilt Sensor E in terms of tilt angles and rainfall. In Figure B10, tilt sensor E exhibited a long-term increase in inclination. Data were not collected during days 23–27 due to poor communication conditions. In addition, erroneous data were observed from days 54–60, which were excluded from analysis. On day 149, when 265.6 mm of rainfall was recorded, an increase in inclination was observed.

Figure B11 illustrates the relationship between inclination rate and rainfall. Figure B11 shows that inclination rates exceeded 0.02°/h and occasionally surpassed 0.1°/h. Approximately 23% of the total plots exceeded 0.02°/h.

Figure B12 shows the change in inclination over a three-day period without rainfall. As shown in Figure B12, tilt sensor E was strongly affected by temperature-induced errors, with a trend of rapid increase in inclination around 9 a.m., followed by convergence around 4 p.m.

|  |
| --- |
| Figure B10. Composite Angle vs. Rainfall (Tilt sensor E) |
|  |
|  |
| Figure B11. Inclination rate vs. Rainfall (Tilt sensor E) |
|  |
|  |
| Figure B12. Effect of Temperature (Tilt Sensor E) |

Sensor H at site A (Figures B13 to B15):

Figure B13 presents one year of observation records from Tilt Sensor H in terms of tilt angles and rainfall. In Figure B13, tilt sensor H provided observational data from day 51 to day 254. A long-term increase in inclination was observed, with additional increases associated with rainfall events. Furthermore, after day 180, inclination continued to increase irrespective of rainfall.

Figure B14 illustrates the relationship between inclination rate and rainfall. Figure B14 shows that approximately 63% of inclination rate values exceeded 0.02°/h, while about 3% exceeded 0.1°/h.

Figure B15 shows the change in inclination over a three-day period without rainfall. As shown in Figure B15, tilt sensor H, although underground, exhibited gradual diurnal variations in inclination. In addition, a decrease in inclination was observed over a short three-day period.

|  |
| --- |
|  |
| Figure B13. Composite Angle vs. Rainfall (Tilt sensor H) |
|  |
|  |
| Figure B14. Inclination rate vs. Rainfall (Tilt sensor H) |
|  |
| Figure B15. Effect of Temperature (Tilt Sensor H) |
